# Supplementary material for: Epidemiological and Genomic Characterisation of Middelburg and Sindbis Alphaviruses Identified in Horses with Febrile and Neurological Infections, South Africa (2014–2018)
Source: MDPI journal article supplement (doi:10.3390/v14092013), 2022-09-11
Supplement: s1 [file s1]

**Table S1.** GenBank accession numbers for members of the *Alphavirus* genus used for phylogenetic analysis in this study. Sequences obtained in the current study are in bold font.

| Antigenic complex                  | Species                              | Host                            | Location      | GenBank accession number (strain name and gene where applicable) |
|------------------------------------|--------------------------------------|---------------------------------|---------------|------------------------------------------------------------------|
| Reference strains                  |                                      |                                 |               |                                                                  |
| Middelburg                         | Middelburg virus                     | Horse                           | South Africa  | KF680222.1 (SAE25/11)                                            |
|                                    |                                      | Horse                           | Zimbabwe      | EF536323.1 (857)                                                 |
|                                    |                                      | <i>Ae. vittatus</i>             | CAR           | KM115530.1 (ArB-8442)                                            |
|                                    |                                      | <i>Am. variegatum</i>           | CAR           | KM115531.1 (ArTB-5290)                                           |
| Western equine encephalitis        | Aura virus                           | <i>Culex (melanoconion) spp</i> | South America | AF126284                                                         |
|                                    | Sindbis virus                        | <i>Culex annulirostris</i>      | Australia     | AF492770                                                         |
|                                    |                                      | Arthropod                       | South Africa  | U38305                                                           |
|                                    | Trocaria virus                       | <i>Culex serratus</i>           | Brazil        | HM147991                                                         |
| Eastern equine encephalitis        | Whataroa virus                       | <i>Cx. Spp</i>                  | New Zealand   | HM147993.1                                                       |
|                                    | EEEV Lin I NA                        | Mosquito                        | USA           | EF151502.1                                                       |
|                                    | EEEV Lin II SA                       | Mosquito                        | Peru          | DQ241303.1                                                       |
|                                    | EEEV Lin III SA                      | Mosquito                        | Peru          | DQ241304.1                                                       |
| Venezuelan Equine Encephalitis     | Venezuelan Equine Encephalitis virus | Mosquito                        | Venezuela     | L04653.1                                                         |
|                                    |                                      | Mosquito                        | Venezuela     | L04653                                                           |
|                                    | Everglades                           | <i>Cx melanoconion sp</i>       | USA           | AF075251.1                                                       |
|                                    | Mucambo virus                        |                                 | Brazil        | AF075253.1                                                       |
|                                    | Tonate virus                         |                                 | Guyana        | AF075254.1                                                       |
| Barmah Forest                      | Barmah Forest virus                  | <i>Cx. annulirostris</i>        | Australia     | MK697274.1                                                       |
| Ndumu                              | Ndumu virus                          | <i>Ae. Spp</i>                  | Africa        | NC_016959.1                                                      |
| Semliki Forest                     | Semliki Forest virus                 | <i>Ae. abnormalis group</i>     | Africa        | X04129.1                                                         |
|                                    | Chikungunya virus                    | Human                           | Africa        | AF369024.2                                                       |
|                                    | O'nyong-nyong virus                  | Human                           | Uganda        | AF079456.1                                                       |
|                                    | Mayaro virus                         | Human                           | French Guiana | KJ013266.2                                                       |
|                                    | Ross river virus                     | <i>Culex and Aedes spp</i>      | Australasia   | GQ433358                                                         |
|                                    | Sagiyama virus                       | <i>Culex and Aedes spp</i>      | Japan         | AB032553                                                         |
|                                    | Getha virus                          | <i>Culex and Aedes spp</i>      | Australasia   | AY702913                                                         |
| Tai Forest alphavirus              | Tai Forest alphavirus                |                                 |               | NC_032681                                                        |
| Eilat                              | Eilat virus                          | <i>An. coustani</i>             | Israel        | NC_018615.1                                                      |
| Sleeping disease                   | Sleeping disease virus               | Rainbow trout                   | France        | AJ316246                                                         |
| Southern elephant seal             | Southern elephant seal virus         | Seal                            | Australia     | NC_016960.1                                                      |
| <b>Current study</b>               |                                      |                                 |               |                                                                  |
| Middelburg                         | Middelburg virus                     | <b>Horse</b>                    | South Africa  | <b>MT015693 (ZRU080/14 full genome)</b>                          |
|                                    |                                      |                                 |               | <b>MT015692 (ZRU089/14 full genome)</b>                          |
|                                    |                                      |                                 |               | <b>MT015691 (ZRU044/17 full genome)</b>                          |
|                                    |                                      |                                 |               | <b>MT015690 (ZRU059/17/1 full genome)</b>                        |
|                                    |                                      |                                 |               | <b>MT015689 (ZRU075/17 full genome)</b>                          |
|                                    |                                      |                                 |               | <b>MT015688 (ZRU103/17 full genome)</b>                          |
|                                    |                                      |                                 |               | <b>MT041775 (ZRU098/17 nsP4)</b>                                 |
| <b>MT041776 (ZRU116/14/1 nsP4)</b> |                                      |                                 |               |                                                                  |
|                                    |                                      |                                 |               | <b>MT041777 (ZRU090/18/2 nsP4)</b>                               |

---

MT041778 (ZRU089/18 nsP4)  
MT041779 (ZRU090/18/5 nsP4)  
MT041780 (ZRU122/18 nsP4)  
MT041781 (ZRU055/17 nsP4)  
MT041782 (ZRU059/17/2 nsP4)  
MT041783 (ZRU074/17 nsP4)  
MT041784 (ZRU076/17 nsP4)  
MT041786 (ZRU129/17 nsP4)  
MT041787 (ZRU240/17 nsP4)  
MT041788 (ZRU107/17/3 nsP4)  
MT041789 (ZRU140/17 nsP4)  
MT041790 (ZRU114/17 nsP4)  
MT041791 (ZRU158/17 nsP4)  
MT041792 (ZRU495/17 nsP4)  
MT041793 (ZRU041/17 nsP4)  
MT041794 (ZRU141/17/6 nsP4)  
MT041795 (ZRU209/17 nsP4)  
MT041796 (ZRU211/17 nsP4)  
MT041797 (ZRU070/17 nsP4)  
MT041798 (ZRU084/17 nsP4)  
MT041799 (ZRU348/17 nsP4)  
MT041800 (ZRU107/17/4 nsP4)  
MT041801 (ZRU069/17 nsP4)  
MT041802 (ZRU078/17 nsP4)  
MT041803 (ZRU053/17 nsP4)  
MT041804 (ZRU194/17/3 nsP4)  
MT041805 (ZRU141/17/1 nsP4)  
MT041806 (ZRU019/17 nsP4)  
MT041807 (ZRU205/17 nsP4)  
MT041808 (ZRU298/17 nsP4)  
MT041809 (ZRU325/17 nsP4)  
MT041810 (ZRU109/14 nsP4)  
MT041811 (ZRU110/14 nsP4)  
MT041812 (ZRU129/14/5 nsP4)  
MT041813 (ZRU213/15 nsP4)  
MT041814 (ZRU052/17 nsP4)  
MT041815 (ZRU247/17 nsP4)  
MT041816 (ZRU180/14/2 nsP4)  
MT041817 (ZRU089/15 nsP4)  
MT041818 (ZRU244/17 nsP4)  
MT041819 (ZRU067/17 nsP4)  
MT041820 (ZRU037/17/2 nsP4)  
MT041821 (ZRU034/17/1 nsP4)  
MT041822 (ZRU060/17 nsP4)  
MT041823 (ZRU238/17 nsP4)  
MT041824 (ZRU110/18 nsP4)  
MT041825 (ZRU053/18 nsP4)  
MT041826 (ZRU207/15 nsP4)  
MT041827 (ZRU034/18 nsP4)  
MT041828 (ZRU029/18 nsP4)  
MT068150 (ZRU014/15 E1)

---

|                    |               |       |              |                             |
|--------------------|---------------|-------|--------------|-----------------------------|
|                    |               |       |              | MT068151 (ZRU053/18 E1)     |
|                    |               |       |              | MT068152 (ZRU029/18 E1)     |
|                    |               |       |              | MT068153 (ZRU122/18 E1)     |
|                    |               |       |              | MT068154 (ZRU089/18 E1)     |
|                    |               |       |              | MT068155 (ZRU034/18 E1)     |
|                    |               |       |              | MT068156 (ZRU089/15 E1)     |
|                    |               |       |              | MT068157 (ZRU495/17 E1)     |
|                    |               |       |              | MT068158 (ZRU034/17/1 E1)   |
|                    |               |       |              | MT068159 (ZRU034/17/2 E1)   |
|                    |               |       |              | MT068160 (ZRU067/17 E1)     |
|                    |               |       |              | MT068161 (ZRU019/17 E1)     |
|                    |               |       |              | MT068162 (ZRU037/17/2 E1)   |
|                    |               |       |              | MT068163 (ZRU041/17 E1)     |
|                    |               |       |              | MT068164 (ZRU060/17 E1)     |
|                    |               |       |              | MT068165 (ZRU069/17 E1)     |
|                    |               |       |              | MT068166 (ZRU078/17 E1)     |
|                    |               |       |              | MT068167 (ZRU084/17 E1)     |
|                    |               |       |              | MT068168 (ZRU140/17 E1)     |
|                    |               |       |              | MT068169 (ZRU158/17 E1)     |
|                    |               |       |              | MT068170 (ZRU209/17 E1)     |
|                    |               |       |              | MT068171 (ZRU240/17 E1)     |
|                    |               |       |              | MT068172 (ZRU247/17 E1)     |
|                    |               |       |              | MT068173 (ZRU194/17/3 E1)   |
|                    |               |       |              | MT068174 (ZRU059/17/2 E1)   |
|                    |               |       |              | MT068175 (ZRU107/17/3 E1)   |
|                    |               |       |              | MT068176 (ZRU052/17 E1)     |
|                    |               |       |              | MT068177 (ZRU053/17 E1)     |
|                    |               |       |              | MT068178 (ZRU055/17 E1)     |
|                    |               |       |              | MT068179 (ZRU107/17/4 E1)   |
|                    |               |       |              | MT068180 (ZRU114/17 E1)     |
|                    |               |       |              | MT068181 (ZRU325/17 E1)     |
|                    |               |       |              | MT068182 (ZRU348/17 E1)     |
|                    |               |       |              | MT068183 (ZRU070/17 E1)     |
|                    |               |       |              | MT068184 (ZRU129/14/5 E1)   |
|                    |               |       |              | MT068185 (ZRU110/14 E1)     |
|                    |               |       |              | MT068186 (ZRU180/14/2 E1)   |
|                    |               |       |              | MT068187 (ZRU109/14 E1)     |
|                    |               |       |              | MT068188 (ZRU244/17 E1)     |
|                    |               |       |              | MT068189 (ZRU026/15 nsP4)   |
|                    |               |       |              | MT068190 (ZRU104/15 nsP4)   |
|                    |               |       |              | MT068191 (ZRU113/14 nsP4)   |
| Western equine en- |               |       |              | MT068192 (ZRU136/15/9 nsP4) |
| cephalitis         | Sindbis virus | Horse | South Africa | MT068193 (ZRU247/14 nsP4)   |
|                    |               |       |              | MT068194 (ZRU165/15/8 nsP4) |
|                    |               |       |              | MT068195 (ZRU030/18 nsP4)   |

Cx. = Culex; Ae. = Aedes; An. = Anopheles, nsP = non-structural Protein

**Table S2.** Comparison of percentage identity of individual proteins and Middelburg virus full genome isolated from horses in the present study to previously identified Middelburg virus strains. Nucleotide and amino acid identities are shown for complete (concatenated) genomes with amino acids in the lower left matrix and nucleotides in the upper right matrix. Only amino acid identities are shown for individual proteins.

| MIDV Strain             | SAE 25/11 | 857    | ArB-8422 | ArTB-5290 | ZRU080/14 | ZRU089/14 | ZRU044/17 | ZRU059/17<br>/1 | ZRU075/17 | ZRU103/17 |
|-------------------------|-----------|--------|----------|-----------|-----------|-----------|-----------|-----------------|-----------|-----------|
| Concatenated ORF1 and 2 |           |        |          |           |           |           |           |                 |           |           |
| SAE25/11                |           | 98.63% | 97.75%   | 98.62%    | 98.90%    | 98.83%    | 98.26%    | 98.26%          | 98.27%    | 98.28%    |
| 857                     | 98.63%    |        | 98.33%   | 99.03%    | 98.89%    | 98.86%    | 98.72%    | 98.72%          | 98.73%    | 98.75%    |
| ArB-8422                | 97.71%    | 98.30% |          | 98.37%    | 97.92%    | 97.90%    | 97.72%    | 97.72%          | 97.73%    | 97.75%    |
| ArTB-5290               | 98.58%    | 99.01% | 98.30%   |           | 98.77%    | 98.72%    | 98.57%    | 98.57%          | 98.57%    | 98.59%    |
| ZRU080/14               | 98.88%    | 98.91% | 97.91%   | 98.78%    |           | 99.91%    | 99.34%    | 99.34%          | 99.35%    | 99.36%    |
| ZRU089/14               | 98.80%    | 98.87% | 97.88%   | 98.71%    | 99.91%    |           | 99.36%    | 99.36%          | 99.35%    | 99.36%    |
| ZRU044/17               | 98.24%    | 98.71% | 97.69%   | 98.55%    | 99.34%    | 99.36%    |           | 100%            | 99.94%    | 99.95%    |
| ZRU059/17/1             | 98.24%    | 98.71% | 97.69%   | 98.55%    | 99.34%    | 99.36%    | 100%      |                 | 99.94%    | 99.95%    |
| ZRU075/17               | 98.24%    | 98.71% | 97.69%   | 98.55%    | 99.34%    | 99.36%    | 99.91%    | 99.91%          |           | 99.98%    |
| ZRU103/17               | 98.27%    | 98.75% | 97.72%   | 98.58%    | 99.37%    | 99.38%    | 99.95%    | 99.95%          | 99.97%    |           |
| nsP1                    |           |        |          |           |           |           |           |                 |           |           |
| SAE25/11                |           |        |          |           |           |           |           |                 |           |           |
| 857                     | 99.26%    |        |          |           |           |           |           |                 |           |           |
| ArB-8422                | 98.88%    | 98.88% |          |           |           |           |           |                 |           |           |
| ArTB-5290               | 99.07%    | 99.07% | 98.70%   |           |           |           |           |                 |           |           |
| ZRU080/14               | 99.63%    | 99.63% | 99.26%   | 99.44%    |           |           |           |                 |           |           |
| ZRU089/14               | 99.63%    | 99.63% | 99.26%   | 99.44%    | 100%      |           |           |                 |           |           |
| ZRU044/17               | 99.63%    | 99.63% | 99.26%   | 99.44%    | 100%      | 100%      |           |                 |           |           |
| ZRU059/17/1             | 99.63%    | 99.63% | 99.26%   | 99.44%    | 100%      | 100%      | 100%      |                 |           |           |
| ZRU075/17               | 99.63%    | 99.63% | 99.26%   | 99.44%    | 100%      | 100%      | 100%      | 100%            |           |           |
| ZRU103/17               | 99.63%    | 99.63% | 99.26%   | 99.44%    | 100%      | 100%      | 100%      | 100%            | 100%      |           |
| nsP2                    |           |        |          |           |           |           |           |                 |           |           |
| SAE25/11                |           |        |          |           |           |           |           |                 |           |           |
| 857                     | 99.37%    |        |          |           |           |           |           |                 |           |           |
| ArB-8422                | 99.62%    | 99.25% |          |           |           |           |           |                 |           |           |
| ArTB-5290               | 99.75%    | 99.37% | 99.62%   |           |           |           |           |                 |           |           |
| ZRU080/14               | 100%      | 99.37% | 99.62%   | 99.75%    |           |           |           |                 |           |           |
| ZRU089/14               | 100%      | 99.37% | 99.62%   | 99.75%    | 100%      |           |           |                 |           |           |
| ZRU044/17               | 99.87%    | 99.50% | 99.75%   | 99.87%    | 99.87%    | 99.87%    |           |                 |           |           |
| ZRU059/17/1             | 99.87%    | 99.50% | 99.75%   | 99.87%    | 99.87%    | 99.87%    | 100%      |                 |           |           |
| ZRU075/17               | 99.75%    | 99.37% | 99.62%   | 99.75%    | 99.75%    | 99.75%    | 99.87%    | 99.87%          |           |           |
| ZRU103/17               | 99.87%    | 99.50% | 99.75%   | 99.87%    | 99.87%    | 99.87%    | 100%      | 100%            | 99.87%    |           |
| nsP3                    |           |        |          |           |           |           |           |                 |           |           |
| SAE25/11                |           |        |          |           |           |           |           |                 |           |           |
| 857                     | 99.14%    |        |          |           |           |           |           |                 |           |           |
| ArB-8422                | 98.92%    | 99.35% |          |           |           |           |           |                 |           |           |
| ArTB-5290               | 99.35%    | 99.78% | 99.57%   |           |           |           |           |                 |           |           |
| ZRU080/14               | 99.35%    | 99.35% | 99.14%   | 99.57%    |           |           |           |                 |           |           |
| ZRU089/14               | 99.35%    | 99.35% | 99.14%   | 99.57%    | 100%      |           |           |                 |           |           |
| ZRU044/17               | 98.49%    | 98.92% | 98.71%   | 99.14%    | 99.14%    | 99.14%    |           |                 |           |           |
| ZRU059/17/1             | 98.49%    | 98.92% | 98.71%   | 99.14%    | 99.14%    | 99.14%    | 100%      |                 |           |           |
| ZRU075/17               | 98.49%    | 98.92% | 98.71%   | 99.14%    | 99.14%    | 99.14%    | 100%      | 100%            |           |           |
| ZRU103/17               | 98.49%    | 98.92% | 98.71%   | 99.14%    | 99.14%    | 99.14%    | 100%      | 100%            | 100%      |           |
| nsP4                    |           |        |          |           |           |           |           |                 |           |           |
| SAE25/11                |           |        |          |           |           |           |           |                 |           |           |
| 857                     | 99.51%    |        |          |           |           |           |           |                 |           |           |
| ArB-8422                | 99.67%    | 99.84% |          |           |           |           |           |                 |           |           |
| ArTB-5290               | 99.67%    | 99.84% | 100%     |           |           |           |           |                 |           |           |
| ZRU080/14               | 99.67%    | 99.84% | 100%     | 100%      |           |           |           |                 |           |           |
| ZRU089/14               | 99.67%    | 99.84% | 100%     | 100%      | 100%      |           |           |                 |           |           |
| ZRU044/17               | 99.34%    | 99.51% | 99.67%   | 99.67%    | 99.67%    | 99.67%    |           |                 |           |           |
| ZRU059/17/1             | 99.34%    | 99.51% | 99.67%   | 99.67%    | 99.67%    | 99.67%    | 100%      |                 |           |           |
| ZRU075/17               | 99.34%    | 99.51% | 99.67%   | 99.67%    | 99.67%    | 99.67%    | 100%      | 100%            |           |           |

|             |        |        |        |        |        |        |      |      |      |
|-------------|--------|--------|--------|--------|--------|--------|------|------|------|
| ZRU103/17   | 99.34% | 99.51% | 99.67% | 99.67% | 99.67% | 99.67% | 100% | 100% | 100% |
| capsid      |        |        |        |        |        |        |      |      |      |
| SAE25/11    |        |        |        |        |        |        |      |      |      |
| 857         | 98.89% |        |        |        |        |        |      |      |      |
| ArB-8422    | 99.26% | 99.63% |        |        |        |        |      |      |      |
| ArTB-5290   | 99.26% | 99.63% | 100%   |        |        |        |      |      |      |
| ZRU080/14   | 99.26% | 98.89% | 99.26% | 99.26% |        |        |      |      |      |
| ZRU089/14   | 99.26% | 98.89% | 99.26% | 99.26% | 100%   |        |      |      |      |
| ZRU044/17   | 98.52% | 98.89% | 99.26% | 99.26% | 99.26% | 99.26% |      |      |      |
| ZRU059/17/1 | 98.52% | 98.89% | 99.26% | 99.26% | 99.26% | 99.26% | 100% |      |      |
| ZRU075/17   | 98.52% | 98.89% | 99.26% | 99.26% | 99.26% | 99.26% | 100% | 100% |      |
| ZRU103/17   | 98.52% | 98.89% | 99.26% | 99.26% | 99.26% | 99.26% | 100% | 100% | 100% |
| E3          |        |        |        |        |        |        |      |      |      |
| SAE25/11    |        |        |        |        |        |        |      |      |      |
| 857         | 100%   |        |        |        |        |        |      |      |      |
| ArB-8422    | 100%   | 100%   |        |        |        |        |      |      |      |
| ArTB-5290   | 100%   | 100%   | 100%   |        |        |        |      |      |      |
| ZRU080/14   | 100%   | 100%   | 100%   | 100%   |        |        |      |      |      |
| ZRU089/14   | 100%   | 100%   | 100%   | 100%   | 100%   |        |      |      |      |
| ZRU044/17   | 100%   | 100%   | 100%   | 100%   | 100%   | 100%   |      |      |      |
| ZRU059/17/1 | 100%   | 100%   | 100%   | 100%   | 100%   | 100%   | 100% |      |      |
| ZRU075/17   | 100%   | 100%   | 100%   | 100%   | 100%   | 100%   | 100% | 100% |      |
| ZRU103/17   | 100%   | 100%   | 100%   | 100%   | 100%   | 100%   | 100% | 100% | 100% |
| E2          |        |        |        |        |        |        |      |      |      |
| SAE25/11    |        |        |        |        |        |        |      |      |      |
| 857         | 99.29% |        |        |        |        |        |      |      |      |
| ArB-8422    | 99.05% | 99.76% |        |        |        |        |      |      |      |
| ArTB-5290   | 99.05% | 99.76% | 100%   |        |        |        |      |      |      |
| ZRU080/14   | 99.05% | 99.76% | 99.52% | 99.52% |        |        |      |      |      |
| ZRU089/14   | 99.05% | 99.76% | 99.52% | 99.52% | 100%   |        |      |      |      |
| ZRU044/17   | 99.05% | 99.76% | 99.52% | 99.52% | 100%   | 100%   |      |      |      |
| ZRU059/17/1 | 99.05% | 99.76% | 99.52% | 99.52% | 100%   | 100%   | 100% |      |      |
| ZRU075/17   | 99.05% | 99.76% | 99.52% | 99.52% | 100%   | 100%   | 100% | 100% |      |
| ZRU103/17   | 99.05% | 99.76% | 99.52% | 99.52% | 100%   | 100%   | 100% | 100% | 100% |
| 6K          |        |        |        |        |        |        |      |      |      |
| SAE25/11    |        |        |        |        |        |        |      |      |      |
| 857         | 100%   |        |        |        |        |        |      |      |      |
| ArB-8422    | 100%   | 100%   |        |        |        |        |      |      |      |
| ArTB-5290   | 98.39% | 98.39% | 98.39% |        |        |        |      |      |      |
| ZRU080/14   | 98.39% | 98.39% | 98.39% | 100%   |        |        |      |      |      |
| ZRU089/14   | 98.39% | 98.39% | 98.39% | 100%   | 100%   |        |      |      |      |
| ZRU044/17   | 100%   | 100%   | 100%   | 98.39% | 98.39% | 98.39% |      |      |      |
| ZRU059/17/1 | 100%   | 100%   | 100%   | 98.39% | 98.39% | 98.39% | 100% |      |      |
| ZRU075/17   | 100%   | 100%   | 100%   | 98.39% | 98.39% | 98.39% | 100% | 100% |      |
| ZRU103/17   | 100%   | 100%   | 100%   | 98.39% | 98.39% | 98.39% | 100% | 100% | 100% |
| E1          |        |        |        |        |        |        |      |      |      |
| SAE25/11    |        |        |        |        |        |        |      |      |      |
| 857         | 99.77% |        |        |        |        |        |      |      |      |
| ArB-8422    | 99.54% | 99.77% |        |        |        |        |      |      |      |
| ArTB-5290   | 99.08% | 99.31% | 99.08% |        |        |        |      |      |      |
| ZRU080/14   | 99.54% | 99.77% | 99.54% | 99.08% |        |        |      |      |      |
| ZRU089/14   | 99.54% | 99.77% | 99.54% | 99.08% | 100%   |        |      |      |      |
| ZRU044/17   | 99.54% | 99.77% | 99.54% | 99.08% | 100%   | 100%   |      |      |      |
| ZRU059/17/1 | 99.54% | 99.77% | 99.54% | 99.08% | 100%   | 100%   | 100% |      |      |
| ZRU075/17   | 99.54% | 99.77% | 99.54% | 99.08% | 100%   | 100%   | 100% | 100% |      |
| ZRU103/17   | 99.54% | 99.77% | 99.54% | 99.08% | 100%   | 100%   | 100% | 100% | 100% |

MIDV = Middelburg virus; ORF = open reading frame; nsP = non-structural Protein.
